# Supplementary material for: In situ modelling of biofilm formation in a hydrothermal spring cave
Source: PubMed Central journal article supplement (PMC7729855; doi:10.1038/s41598-020-78759-4), 2020-12-10
Supplement: 41598_2020_78759_MOESM1_ESM.pdf [file 41598_2020_78759_MOESM1_ESM.pdf]

## In situ modelling of biofilm formation in a hydrothermal spring cave

Dóra Anda<sup>1</sup>, Attila Szabó<sup>1</sup>, Petra Kovács-Bodor<sup>3</sup>, Judit Makk<sup>1</sup>, Tamás Felföldi<sup>1</sup>,  
Éva Ács<sup>2,4</sup>, Judit Mádl-Szőnyi<sup>3</sup>, Andrea K. Borsodi<sup>1,2</sup>

<sup>1</sup>Department of Microbiology, ELTE Eötvös Loránd University, Pázmány P. sétány 1/C, H-1117 Budapest, Hungary

<sup>2</sup>Danube Research Institute, Centre for Ecological Research, Karolina út 29, Budapest H-1113, Hungary

<sup>3</sup>Department of Geology, ELTE Eötvös Loránd University, Pázmány P. sétány 1/C, H-1117 Budapest, Hungary

<sup>4</sup>National University of Public Service, Faculty of Water Sciences, Bajcsy-Zsilinszky utca, 12-14, H-6500 Baja, Hungary

## Supplementary Figures

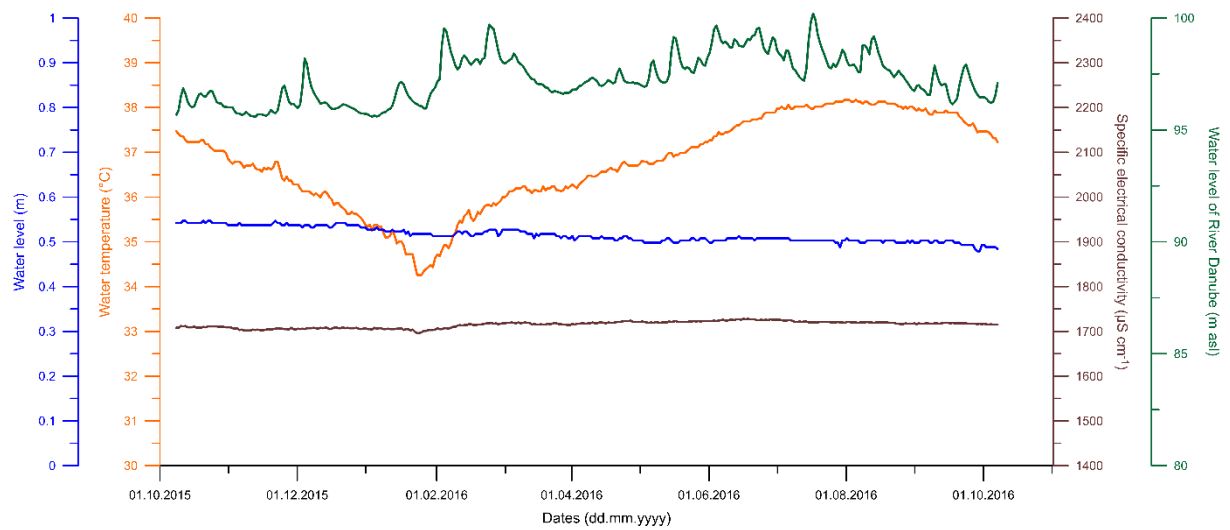

**Suppl Figure 1.** Changes in specific electrical conductivity, temperature and water level of RT spring cave compared with the actual level of the Danube river

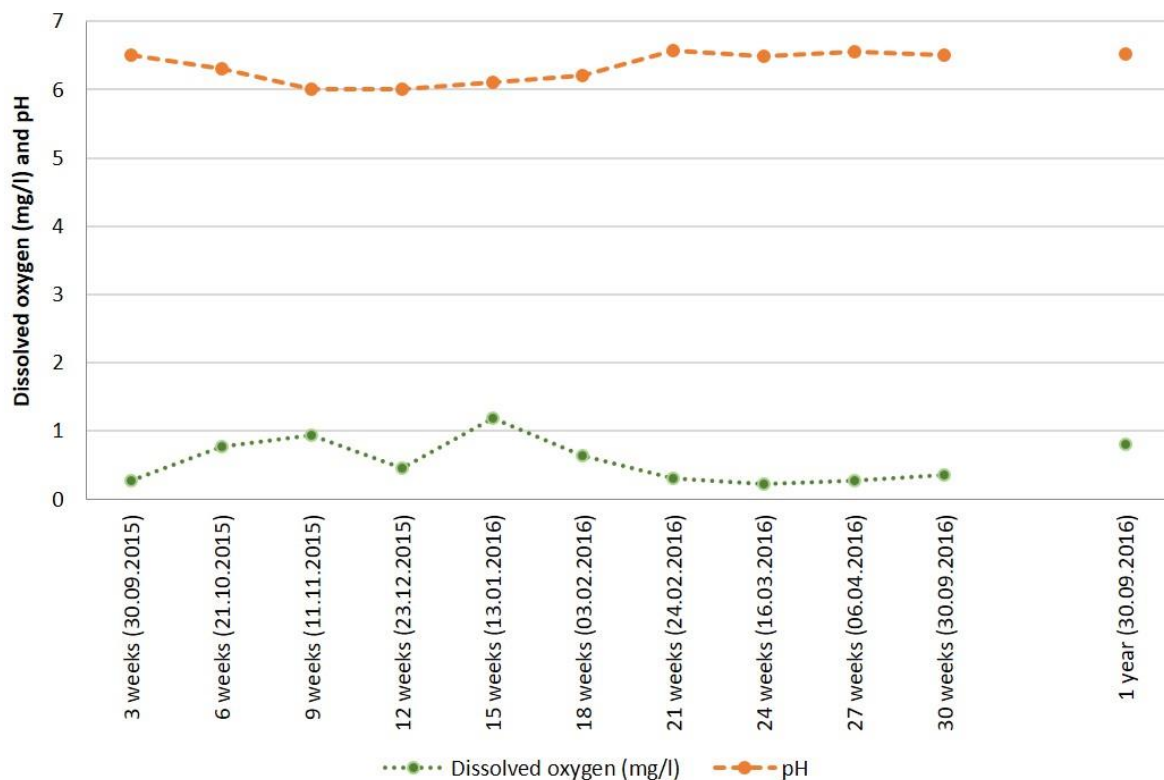

**Suppl Figure 2.** Changes in pH and dissolved oxygen content of RT spring cave water during the *in situ* experiment

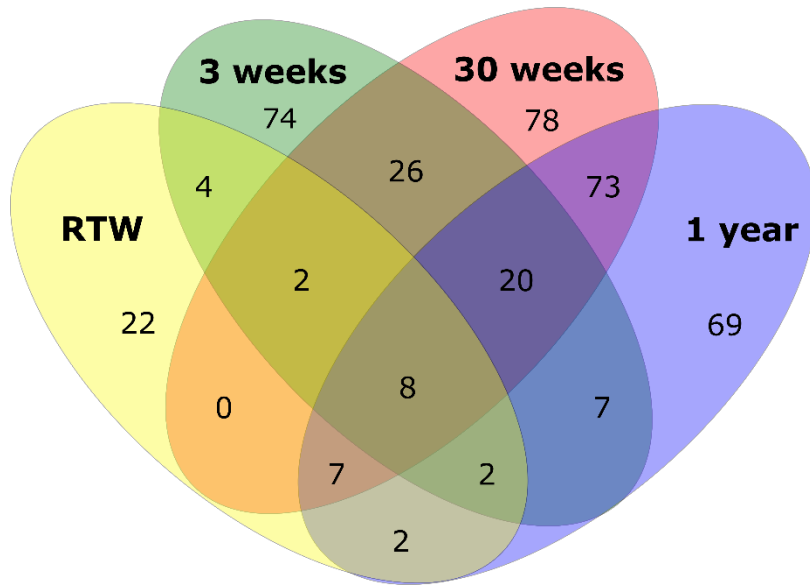

**Suppl Figure 3.** Venn diagram showing the unique and shared OTUs in 3 weeks, 30 weeks, one-year-old biofilm and thermal water samples
